# Supplementary material
Source: MDPI journal article supplement (https://www.mdpi.com/2073-4352/13/7/1089)
Supplement: s1 [file s1]

# Supplementary Information

## **Synthesis, Structure, and Characterizations of a Heterobimetallic Heptanuclear Complex [Pb<sub>2</sub>Co<sub>5</sub>(acac)<sub>14</sub>]**

Yuxuan Zhang<sup>1</sup>, Zheng Wei<sup>1</sup>, Evgeny V. Dikarev<sup>1\*</sup>

<sup>1</sup>*Department of Chemistry, University at Albany, State University of New York, Albany, NY, 12222, USA*

\*Author to whom correspondence should be addressed.

E-mail: edikarev@albany.edu

## Table of Content

|                                                                                                                   |   |
|-------------------------------------------------------------------------------------------------------------------|---|
| 1. Direct Analysis in Real Time Mass Spectrometry (DART-MS) of $[\text{Pb}_2\text{Co}_5(\text{acac})_{14}]$ ..... | 3 |
| 2. ATR-IR Spectrum of $[\text{Pb}_2\text{Co}_5(\text{acac})_{14}]$ .....                                          | 4 |
| 3. Crystal Structure of $[\text{Pb}_2\text{Co}_5(\text{acac})_{14}]$ .....                                        | 5 |
| 4. Crystal Structure of $[\text{PbCo}(\text{acac})_4]$ .....                                                      | 7 |

# 1. Direct Analysis in Real Time Mass Spectrometry (DART-MS) of [Pb<sub>2</sub>Co<sub>5</sub>(acac)<sub>14</sub>]

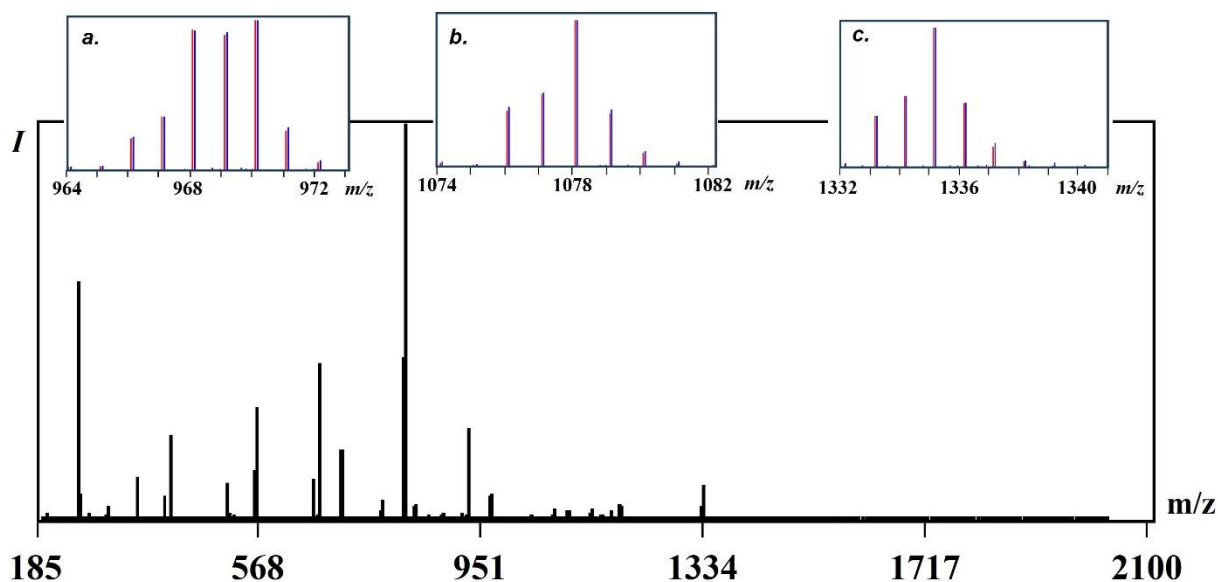

**Figure S1.** DART-MS spectrum of [Pb<sub>2</sub>Co<sub>5</sub>(acac)<sub>14</sub>] in a positive mode. The isotope distribution patterns for a) [Pb<sub>2</sub>Co(acac)<sub>5</sub>]<sup>+</sup>, b) [PbCo<sub>3</sub>(acac)<sub>7</sub>]<sup>+</sup>, and c) [PbCo<sub>4</sub>(acac)<sub>9</sub>]<sup>+</sup> peaks are shown in the inset. Blue and red lines are experimental and calculated patterns, respectively.

**Table S1.** Assignment of ions detected in a positive-ion DART mass spectrum of [Pb<sub>2</sub>Co<sub>5</sub>(acac)<sub>14</sub>] (acac = C<sub>5</sub>H<sub>7</sub>O<sub>2</sub>). All ions having relative intensity higher than 2% are shown in the table.

| Ions                                                  | Measured, <i>m/z</i> | Calculated, <i>m/z</i> | <i>Δ</i> | % Base |
|-------------------------------------------------------|----------------------|------------------------|----------|--------|
| [PbCo <sub>4</sub> (acac) <sub>9</sub> ] <sup>+</sup> | 1335.1158            | 1335.1109              | 0.0049   | 8.76   |
| [PbCo <sub>3</sub> (acac) <sub>7</sub> ] <sup>+</sup> | 1078.0908            | 1078.0885              | 0.0023   | 3.00   |
| [Pb <sub>2</sub> Co(acac) <sub>5</sub> ] <sup>+</sup> | 970.1122             | 970.1095               | 0.0027   | 6.41   |
| [Co <sub>4</sub> (acac) <sub>7</sub> ] <sup>+</sup>   | 929.0517             | 929.0450               | 0.0067   | 22.88  |
| [PbCo <sub>2</sub> (acac) <sub>5</sub> ] <sup>+</sup> | 821.0725             | 821.0661               | 0.0064   | 100    |
| [Pb <sub>2</sub> (acac) <sub>3</sub> ] <sup>+</sup>   | 713.0949             | 713.0871               | 0.0078   | 17.71  |
| [Co <sub>3</sub> (acac) <sub>5</sub> ] <sup>+</sup>   | 672.0242             | 672.0226               | 0.0016   | 39.28  |
| [PbCo(acac) <sub>3</sub> ] <sup>+</sup>               | 564.0454             | 564.0437               | 0.0017   | 28.20  |
| [Co <sub>2</sub> (acac) <sub>3</sub> ] <sup>+</sup>   | 415.0054             | 415.0002               | 0.0052   | 21.25  |
| [HPb(acac) <sub>2</sub> ] <sup>+</sup>                | 407.0775             | 407.0737               | 0.0038   | 6.05   |
| [HCo(acac) <sub>2</sub> ] <sup>+</sup>                | 258.0373             | 258.0302               | 0.0051   | 60.13  |

## 2. ATR-IR Spectrum of $[\text{Pb}_2\text{Co}_5(\text{acac})_{14}]$

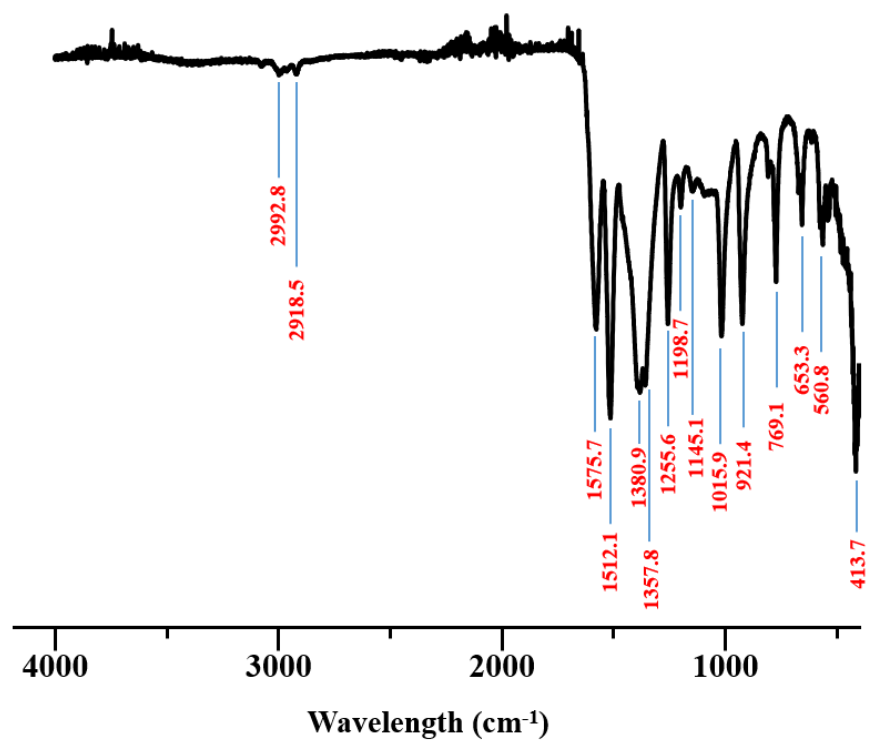

**Figure S2.** The attenuated total reflection (ATR) spectrum of  $[\text{Pb}_2\text{Co}_5(\text{acac})_{14}]$ .

### 3. Crystal Structure of $[\text{Pb}_2\text{Co}_5(\text{acac})_{14}]$

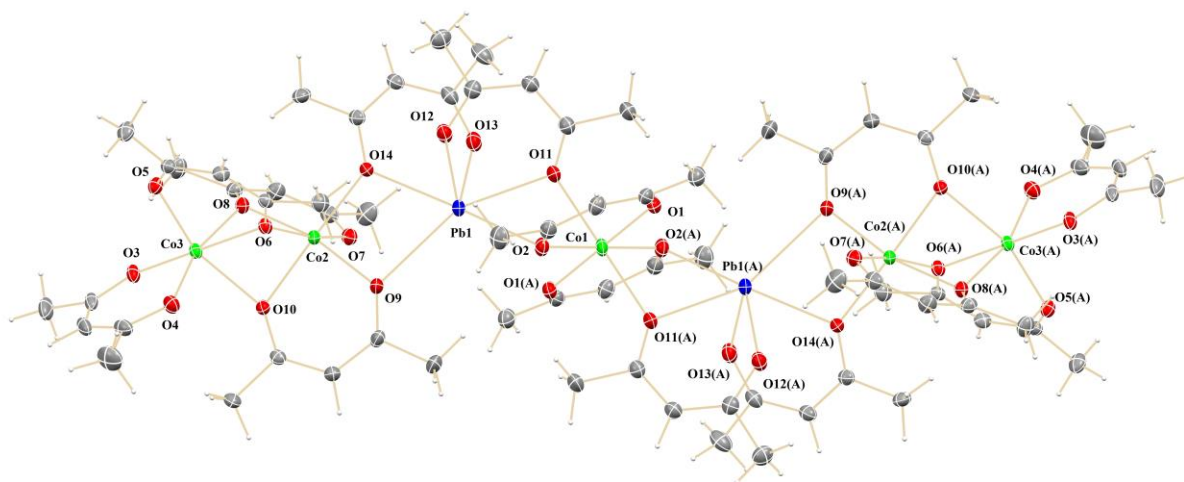

**Figure S3.** Crystal structure of  $[\text{Pb}_2\text{Co}_5(\text{acac})_{14}]$ . The Pb, Co, O and C atoms are represented by thermal ellipsoids at the 40% probability level. Hydrogen atoms are shown as spheres of arbitrary radius.

**Table S2.** Bond distances (Å) and angles (°) in the structure of [Pb<sub>2</sub>Co<sub>5</sub>(acac)<sub>14</sub>].

| Bond distances    |            |                   |            |                  |            |              |            |
|-------------------|------------|-------------------|------------|------------------|------------|--------------|------------|
| Pb(1)-O(2)*       | 2.7904(15) | Co(1)-O(1)        | 2.0127(15) | Co(2)-O(6)*      | 2.0911(14) | Co(3)-O(3)   | 1.9813(14) |
| Pb(1)-O(9)*       | 2.8581(14) | Co(1)-O(2)**      | 2.0186(14) | Co(2)-O(7)       | 2.0483(15) | Co(3)-O(4)   | 2.0193(15) |
| Pb(1)-O(11)**     | 2.4844(14) | Co(1)-O(11)*      | 2.2638(15) | Co(2)-O(8)**     | 2.0589(14) | Co(3)-O(5)   | 2.0509(14) |
| Pb(1)-O(12)       | 2.3402(16) |                   |            | Co(2)-O(9)**     | 2.0241(14) | Co(3)-O(6)** | 2.0355(13) |
| Pb(1)-O(13)       | 2.3458(17) |                   |            | Co(2)-O(10)**    | 2.0726(14) | Co(3)-O(8)*  | 2.1957(14) |
| Pb(1)-O(14)**     | 2.4905(14) |                   |            | Co(2)-O(14)*     | 2.0965(15) | Co(3)-O(10)* | 2.2186(13) |
| Angles            |            |                   |            |                  |            |              |            |
| O(2)-Pb(1)-O(9)   | 94.74(4)   | O(6)-Co(2)-O(14)  | 94.02(6)   | O(3)-Co(3)-O(4)  | 91.67(7)   |              |            |
| O(11)-Pb(1)-O(2)  | 65.72(5)   | O(7)-Co(2)-O(6)   | 167.65(6)  | O(3)-Co(3)-O(5)  | 96.19(6)   |              |            |
| O(11)-Pb(1)-O(9)  | 156.36(5)  | O(7)-Co(2)-O(8)   | 88.82(6)   | O(3)-Co(3)-O(6)  | 173.09(6)  |              |            |
| O(11)-Pb(1)-O(14) | 138.95(5)  | O(7)-Co(2)-O(10)  | 103.29(6)  | O(3)-Co(3)-O(8)  | 95.95(6)   |              |            |
| O(12)-Pb(1)-O(2)  | 137.70(5)  | O(7)-Co(2)-O(14)  | 86.22(6)   | O(3)-Co(3)-O(10) | 100.54(6)  |              |            |
| O(12)-Pb(1)-O(9)  | 126.85(5)  | O(8)-Co(2)-O(6)   | 79.34(5)   | O(4)-Co(3)-O(5)  | 91.54(6)   |              |            |
| O(12)-Pb(1)-O(11) | 75.06(5)   | O(8)-Co(2)-O(10)  | 78.19(6)   | O(4)-Co(3)-O(6)  | 94.40(6)   |              |            |
| O(12)-Pb(1)-O(13) | 86.58(6)   | O(8)-Co(2)-O(14)  | 107.65(6)  | O(4)-Co(3)-O(8)  | 165.62(6)  |              |            |
| O(12)-Pb(1)-O(14) | 76.05(5)   | O(9)-Co(2)-O(6)   | 103.07(6)  | O(4)-Co(3)-O(10) | 94.31(6)   |              |            |
| O(13)-Pb(1)-O(2)  | 70.57(5)   | O(9)-Co(2)-O(7)   | 89.26(6)   | O(5)-Co(3)-O(8)  | 99.71(6)   |              |            |
| O(13)-Pb(1)-O(9)  | 109.43(5)  | O(9)-Co(2)-O(8)   | 166.11(6)  | O(5)-Co(3)-O(10) | 162.09(5)  |              |            |
| O(13)-Pb(1)-O(11) | 77.67(5)   | O(9)-Co(2)-O(10)  | 88.87(6)   | O(6)-Co(3)-O(5)  | 86.94(6)   |              |            |
| O(13)-Pb(1)-O(14) | 72.07(5)   | O(9)-Co(2)-O(14)  | 85.94(6)   | O(6)-Co(3)-O(8)  | 77.42(5)   |              |            |
| O(14)-Pb(1)-O(2)  | 125.65(5)  | O(10)-Co(2)-O(6)  | 77.84(5)   | O(6)-Co(3)-O(10) | 75.75(5)   |              |            |
| O(14)-Pb(1)-O(9)  | 62.93(4)   | O(10)-Co(2)-O(14) | 169.12(6)  | O(8)-Co(3)-O(10) | 72.34(5)   |              |            |
| O(1)-Co(1)-O(2)   | 91.33(6)   |                   |            |                  |            |              |            |
| O(1)-Co(1)-O(2A)  | 88.67(6)   |                   |            |                  |            |              |            |
| O(1)-Co(1)-O(11)  | 81.37(6)   |                   |            |                  |            |              |            |
| O(1)-Co(1)-O(11A) | 98.63(6)   |                   |            |                  |            |              |            |
| O(2)-Co(1)-O(11A) | 84.09(6)   |                   |            |                  |            |              |            |
| O(2)-Co(1)-O(11)  | 95.91(6)   |                   |            |                  |            |              |            |

\* – bridging oxygen; \*\* – chelating-bridging oxygen.

Symmetry code: (A) -x+1, -y+1, -z+1

#### 4. Crystal Structure of [PbCo(acac)<sub>4</sub>]

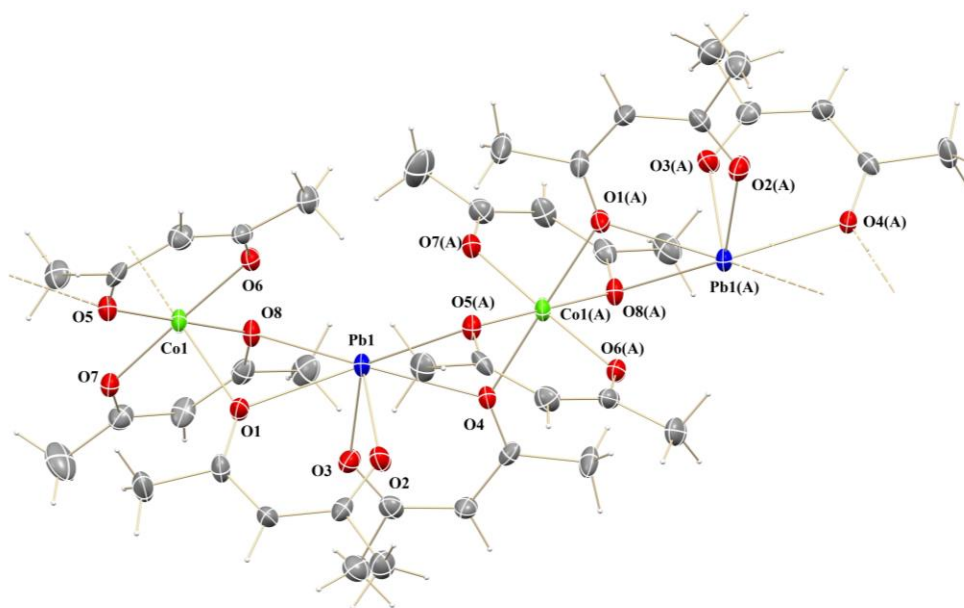

**Figure S4.** Fragment of the solid-state structure of polymeric [PbCo(acac)<sub>4</sub>] drawn with thermal ellipsoids at the 40% probability level. Hydrogen atoms are shown as spheres of arbitrary radius.

**Table S3.** Bond distances (Å) and angles (°) in the structure of [PbCo(acac)<sub>4</sub>].

| Bond distances   |            |                  |          |
|------------------|------------|------------------|----------|
| Pb(1)-O(1)**     | 2.517(6)   | Co(1)-O(1)*      | 2.237(6) |
| Pb(1)-O(2)       | 2.315(7)   | Co(1)-O(4A)*     | 2.218(6) |
| Pb(1)-O(3)       | 2.310(6)   | Co(1)-O(5)**     | 2.036(6) |
| Pb(1)-O(4)**     | 2.512(6)   | Co(1)-O(6)       | 2.031(6) |
| Pb(1)-O(5A)*     | 2.884(6)   | Co(1)-O(7)       | 2.017(6) |
| Pb(1)-O(8)*      | 2.860(6)   | Co(1)-O(8)**     | 2.036(7) |
| Angles           |            |                  |          |
| O(1)-Pb(1)-O(5A) | 124.55(19) | O(4A)-Co(1)-O(1) | 179.0(2) |
| O(1)-Pb(1)-O(8)  | 64.58(2)   | O(5)-Co(1)-O(1)  | 94.7(2)  |
| O(2)-Pb(1)-O(1)  | 74.3(2)    | O(5)-Co(1)-O(4A) | 85.5(2)  |
| O(2)-Pb(1)-O(4)  | 81.0(2)    | O(6)-Co(1)-O(1)  | 82.1(2)  |
| O(2)-Pb(1)-O(5A) | 70.4(2)    | O(6)-Co(1)-O(4)  | 96.9(2)  |
| O(2)-Pb(1)-O(8)  | 133.13(18) | O(6)-Co(1)-O(5)  | 90.3(3)  |
| O(3)-Pb(1)-O(1)  | 79.0(2)    | O(6)-Co(1)-O(8)  | 89.1(3)  |
| O(3)-Pb(1)-O(2)  | 79.7(2)    | O(7)-Co(1)-O(1)  | 96.5(2)  |
| O(3)-Pb(1)-O(4)  | 75.0(2)    | O(7)-Co(1)-O(4A) | 84.5(2)  |
| O(3)-Pb(1)-O(5A) | 132.26(19) | O(7)-Co(1)-O(5)  | 90.5(3)  |
| O(3)-Pb(1)-O(8)  | 71.42(2)   | O(7)-Co(1)-O(6)  | 178.5(2) |
| O(4)-Pb(1)-O(1)  | 146.9(2)   | O(7)-Co(1)-O(8)  | 90.1(3)  |
| O(4)-Pb(1)-O(5A) | 64.34(18)  | O(8)-Co(1)-O(1)  | 84.9(2)  |
| O(4)-Pb(1)-O(8)  | 123.75(19) | O(8)-Co(1)-O(4)  | 94.9(2)  |
| O(5A)-Pb(1)-O(8) | 153.59(18) | O(8)-Co(1)-O(5)  | 179.3(3) |

\* – bridging oxygen; \*\* – chelating-bridging oxygen.

Symmetry codes: (A)  $x, -y+1/2, z-1/2$
